# Supplementary material for: Low-energy optical switching of SO2 linkage isomerisation in single crystals of a ruthenium-based coordination complex
Source: Royal Society of Chemistry journal article supplement (doi:10.1039/d1ra01696b), 2021-01-01
Supplement: d1ra01696b1.pdf [file d1ra01696b1.pdf]

**Electronic Supplementary Information for:**

**Low-energy optical switching of SO<sub>2</sub> linkage**

**isomerisation in single crystals of a ruthenium-based coordination complex**

Jacqueline M. Cole,<sup>a,b,c,d\*</sup> David J. Gosztola,<sup>d</sup> Sven O. Sylvester<sup>a</sup>

<sup>a</sup> Cavendish Laboratory, Department of Physics, University of Cambridge, J. J. Thomson Avenue, Cambridge, CB3 0HE, UK.

<sup>b</sup> ISIS Neutron and Muon Source, STFC Rutherford Appleton Laboratory, Harwell Science and Innovation Campus, Didcot, OX11 0QX, UK.

<sup>c</sup> Department of Chemical Engineering and Biotechnology, University of Cambridge, West Cambridge Site, Philippa Fawcett Drive, Cambridge, CB3 0AS, UK.

<sup>d</sup> Argonne National Laboratory, 9700 South Cass Avenue, Lemont, Illinois 60439, United States

\* Author for correspondence (J. M. Cole): [jmc61@cam.ac.uk](mailto:jmc61@cam.ac.uk)

**Table of Contents**

|                                                                                                                                                                                                                                        |                           |
|----------------------------------------------------------------------------------------------------------------------------------------------------------------------------------------------------------------------------------------|---------------------------|
| S1 – Single-crystal Raman Spectroscopy for <b>1</b> .....                                                                                                                                                                              | S2-S3                     |
| S2 - Single-crystal optical absorption spectra of <b>1</b> as a function of thermal decay at seven temperatures.....                                                                                                                   | S4-S10                    |
| S3 - Hirshfeld surfaces of the anions in the dark and light-induced crystal structures of <b>1</b> and <i>trans</i> -[Ru(SO <sub>2</sub> )(NH <sub>3</sub> ) <sub>4</sub> (H <sub>2</sub> O)]chlorobenzenesulfonate <sub>2</sub> ..... | S11-S14                   |
| S4 – References .....                                                                                                                                                                                                                  | S15                       |
| S5 – Single-crystal optical microscopy videos of <b>1</b> as a function of light and thermal decay .....                                                                                                                               | ( <i>separate files</i> ) |
| S6 – Crystallographic information files of the dark- and light-induced state of <b>1</b> .....                                                                                                                                         | ( <i>separate files</i> ) |

### S1 – Single-crystal Raman Spectroscopy for 1

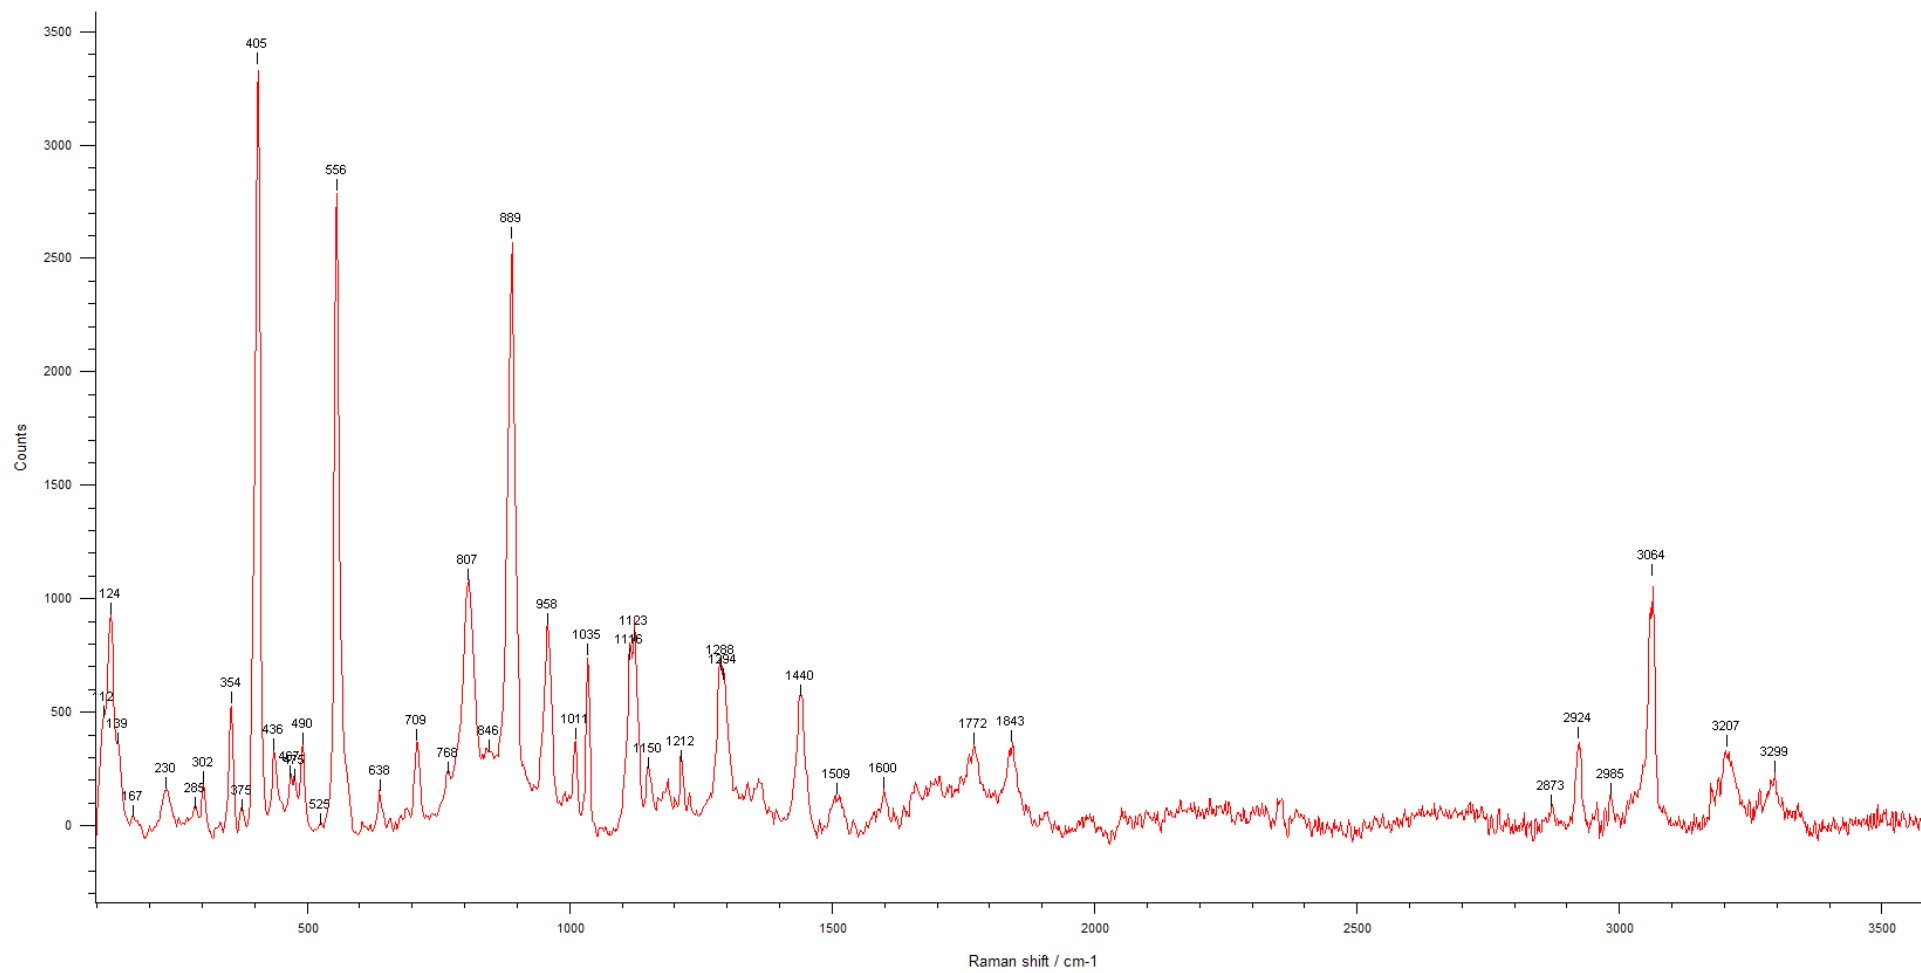

Figure S1 - Single-crystal Raman spectrum of 1 at 90 K

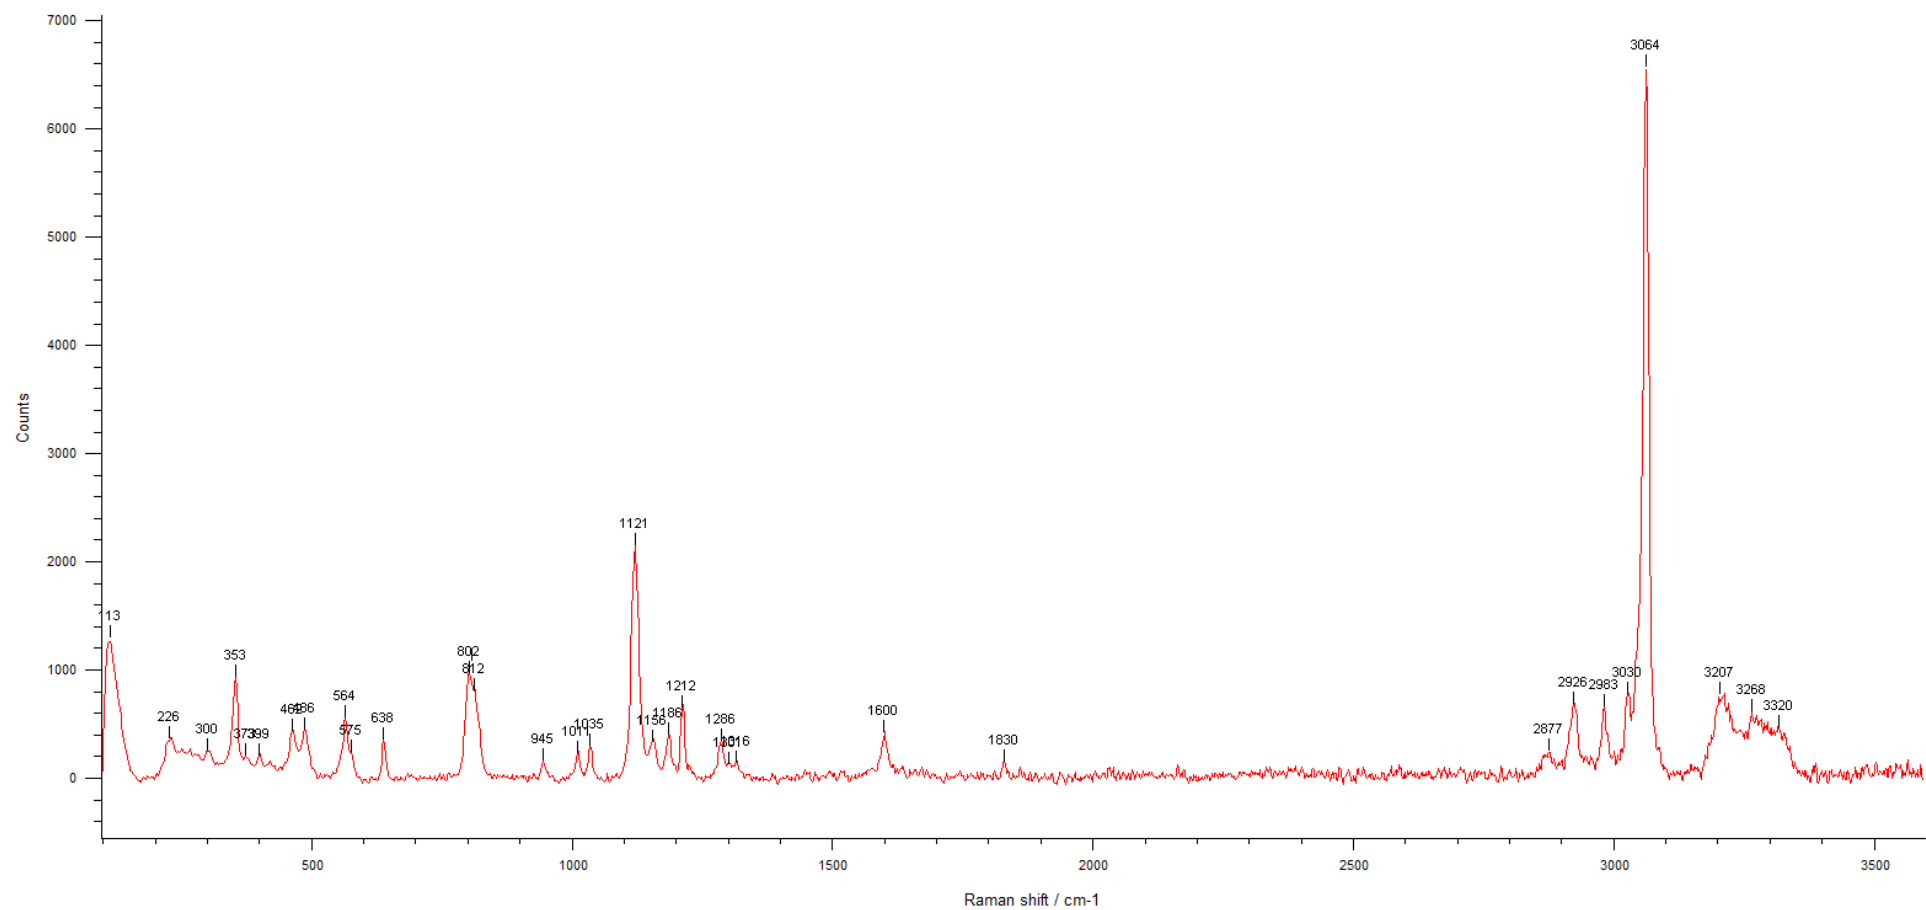

**Figure S2** - Single-crystal Raman spectrum of **1** at 300 K

S2 - Single-crystal optical absorption spectra of 1 as a function of thermal decay at seven temperatures

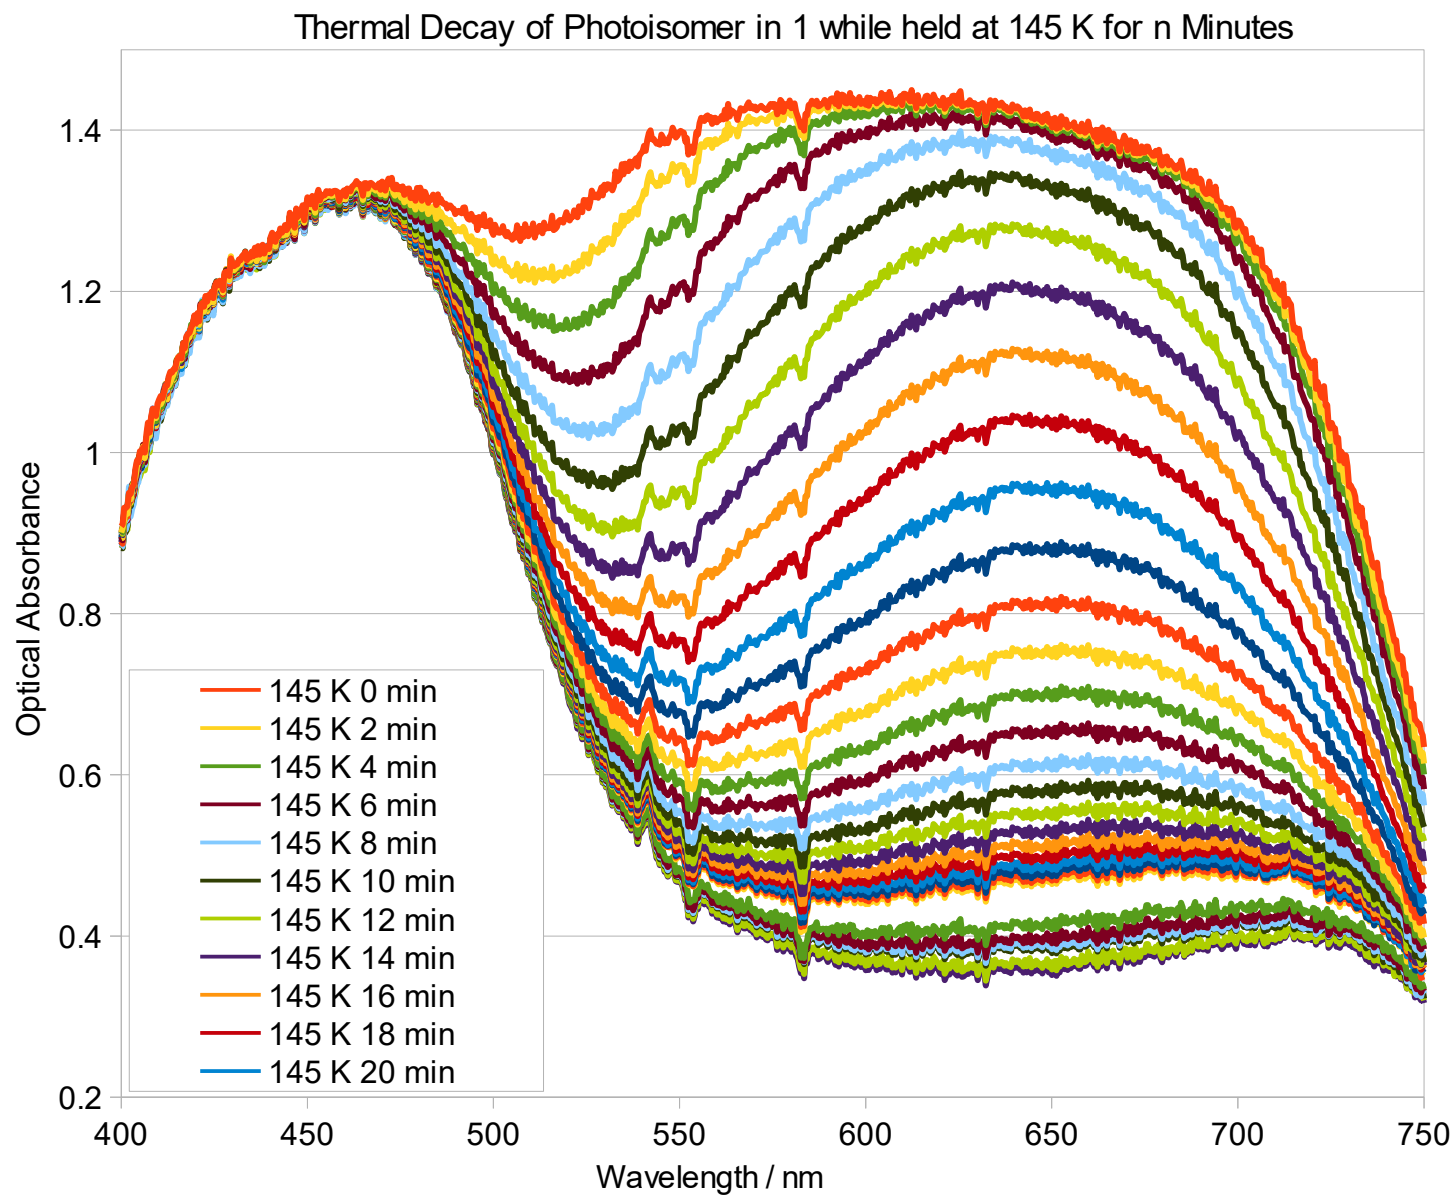

Thermal Decay of 1 while held at 148 K for n Minutes

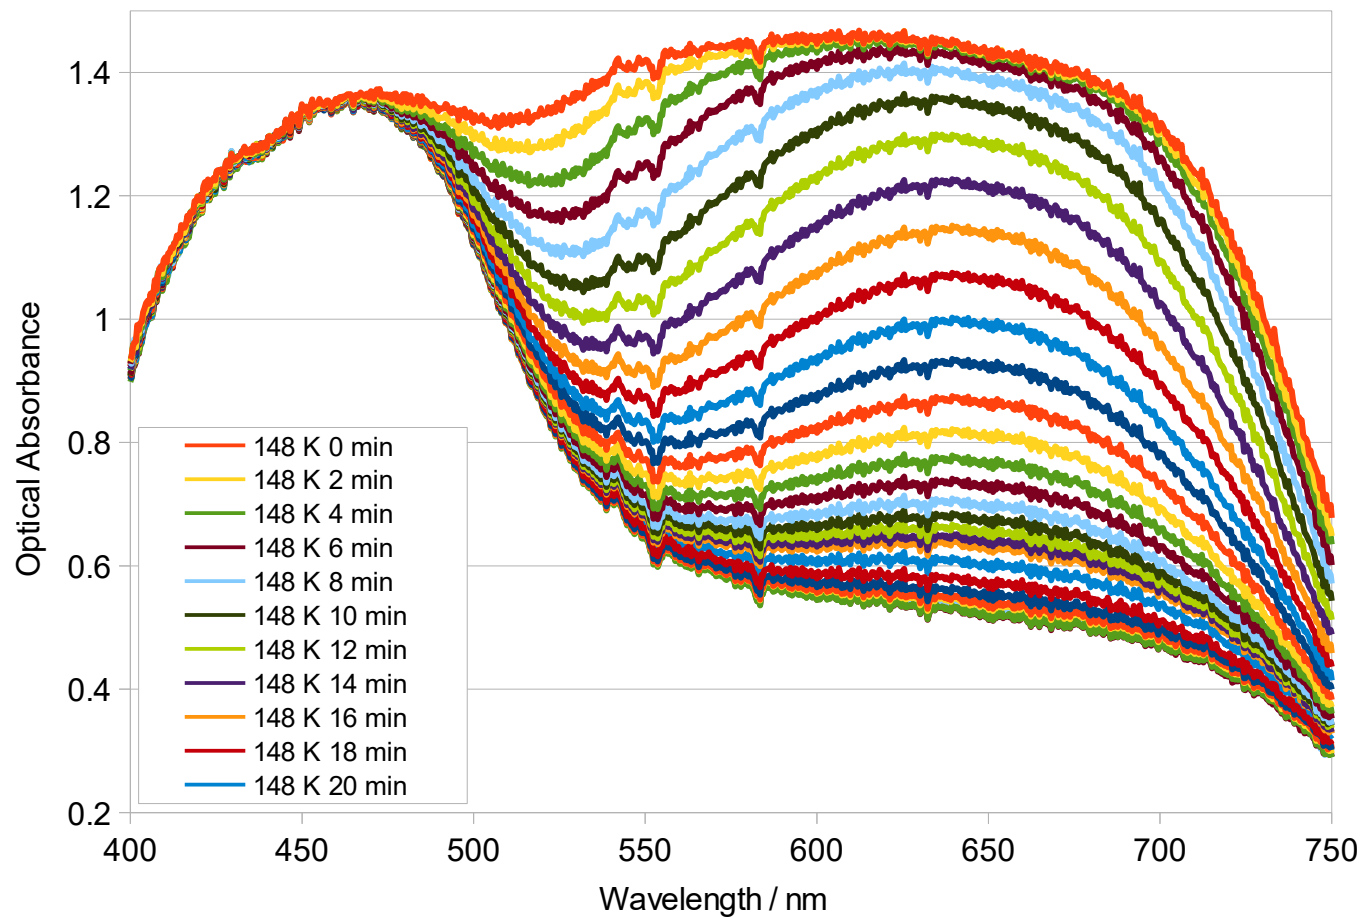

Thermal Decay of 1 while held at 151 K for n Minutes

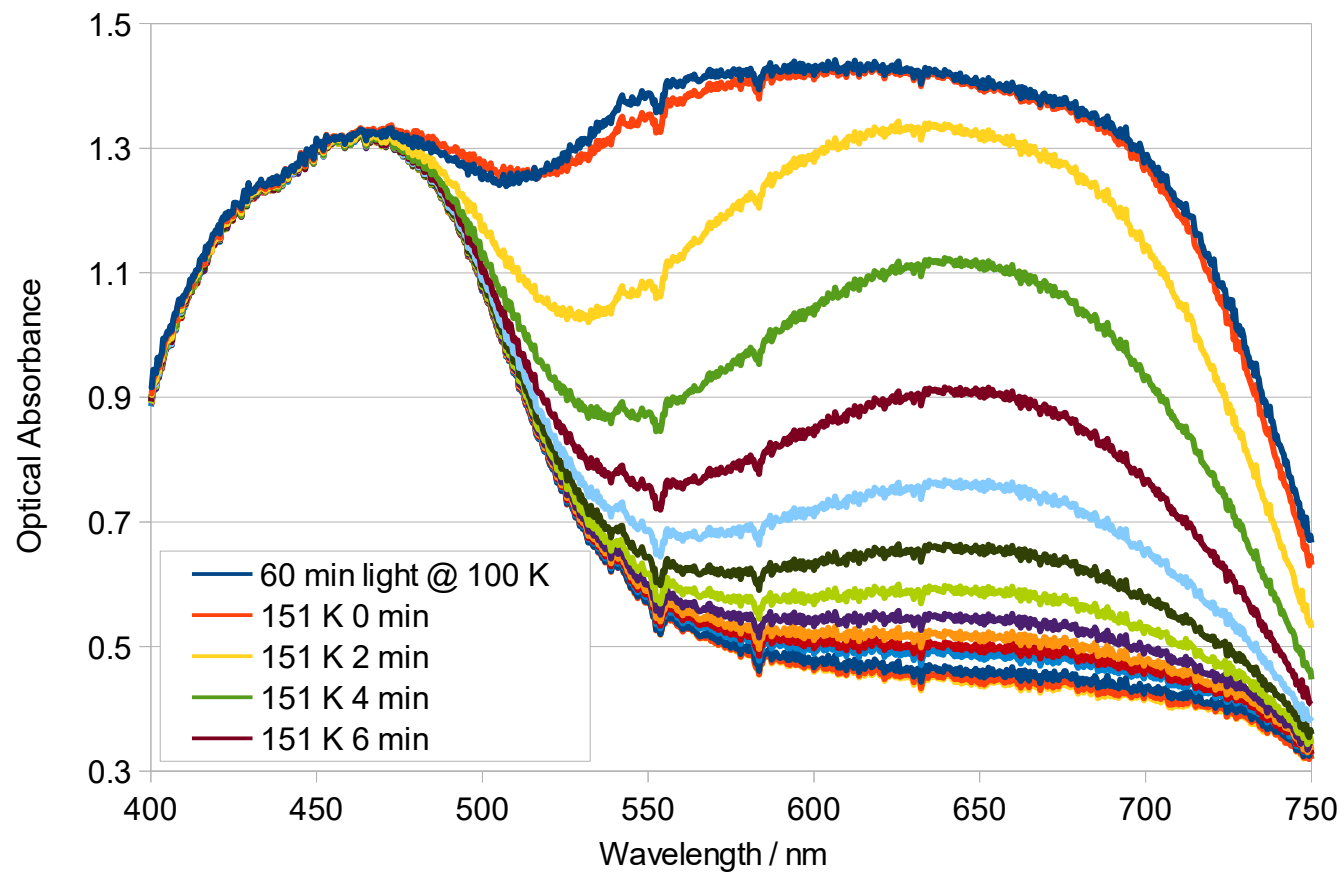

Thermal Decay of 1 while held at 154 K for n Minutes

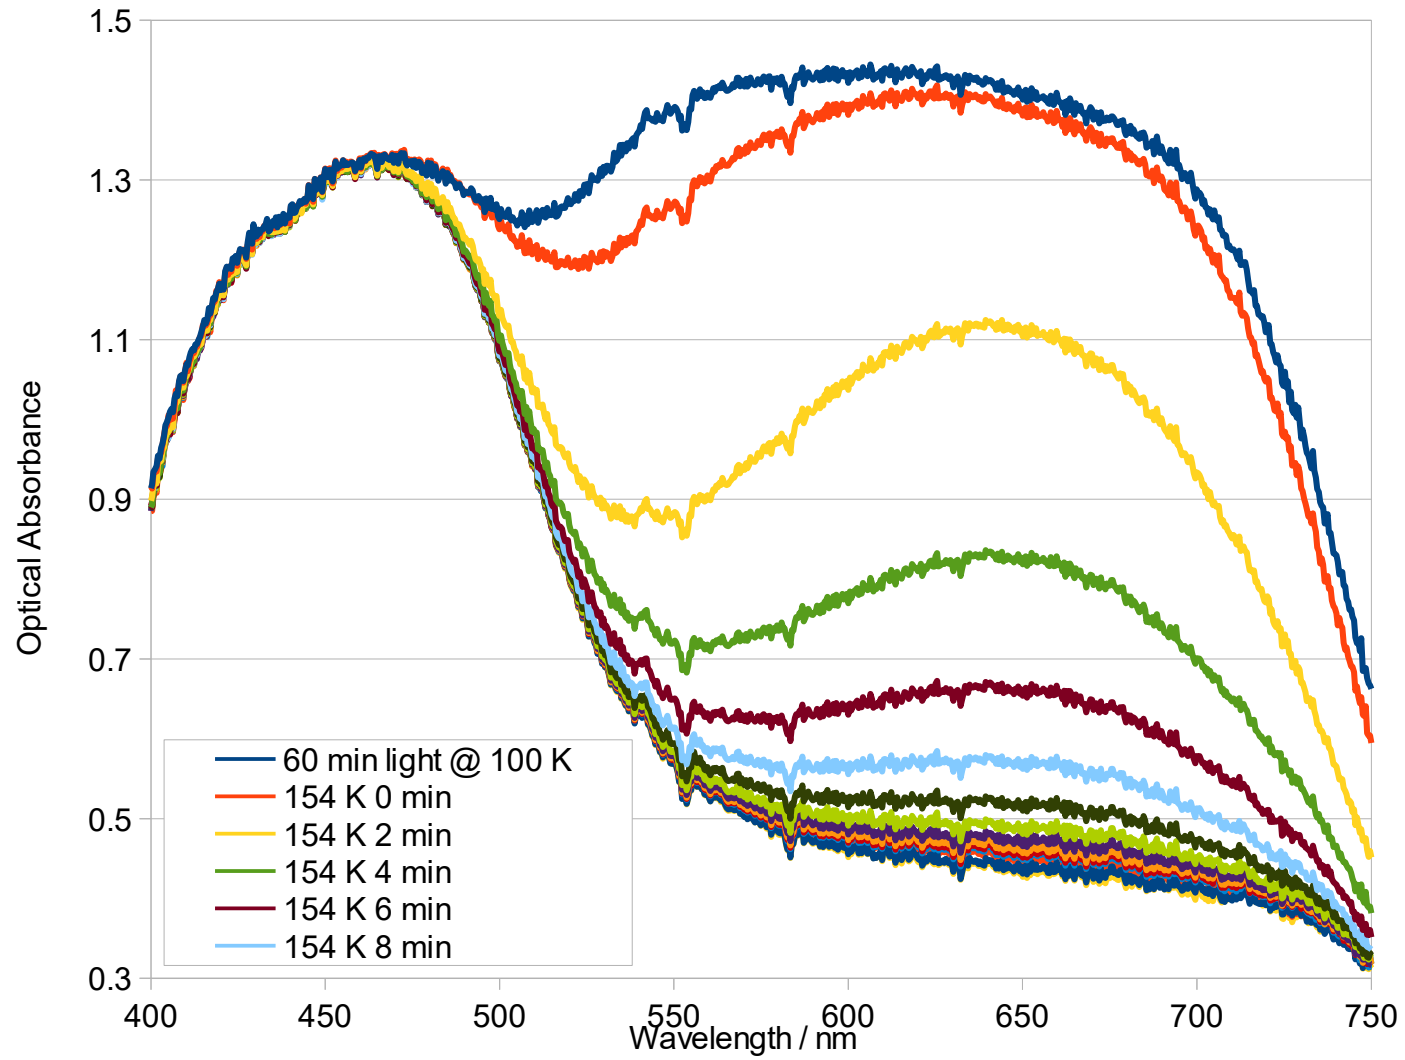

Thermal Decay of 1 while held at 157 K for n Minutes

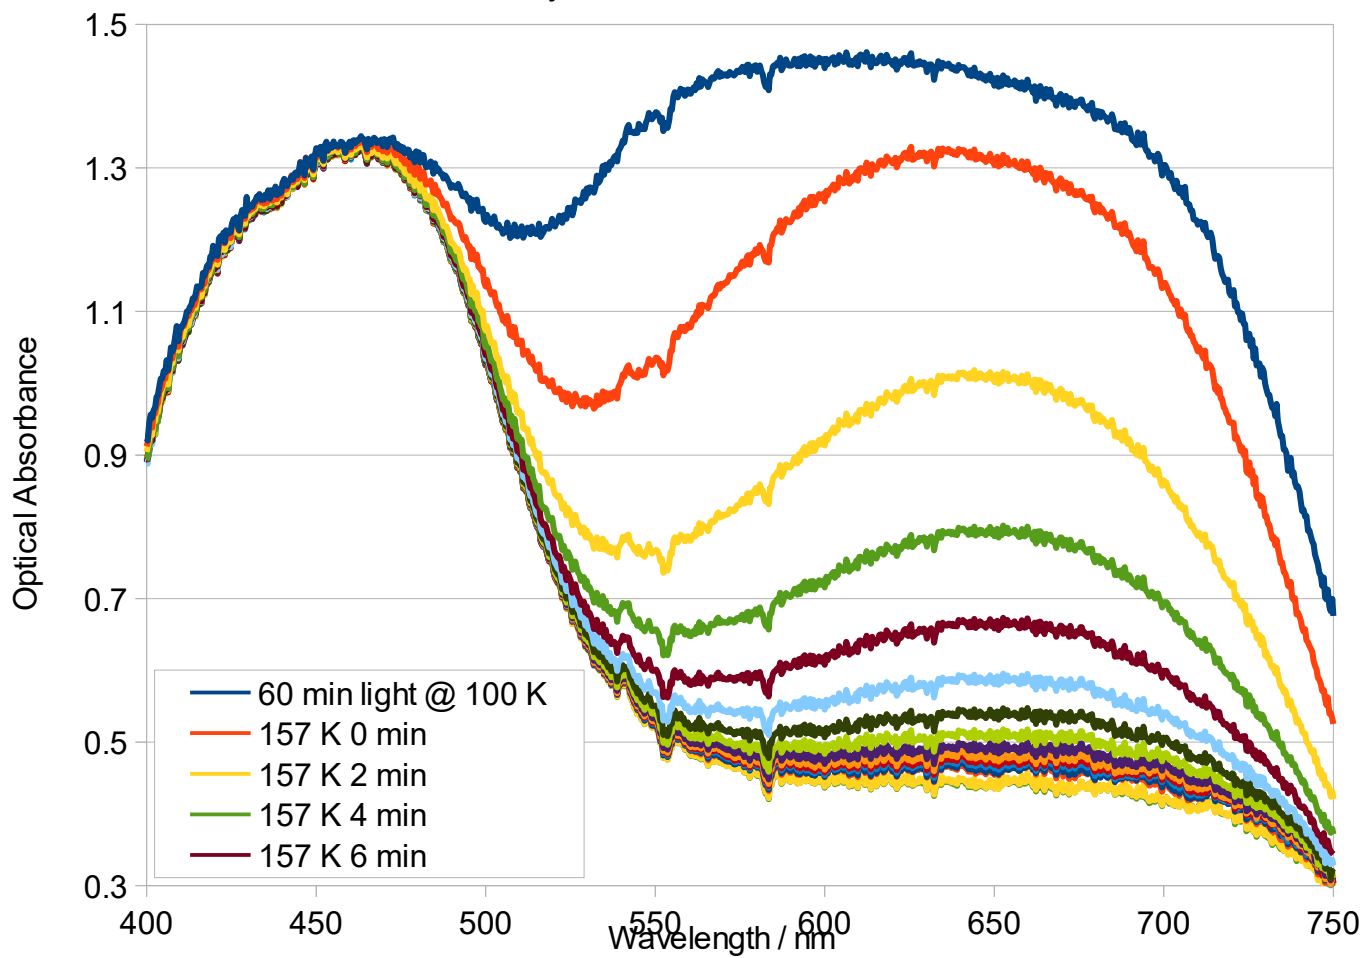



Thermal Decay of 1 while held at 160 K for n Minutes

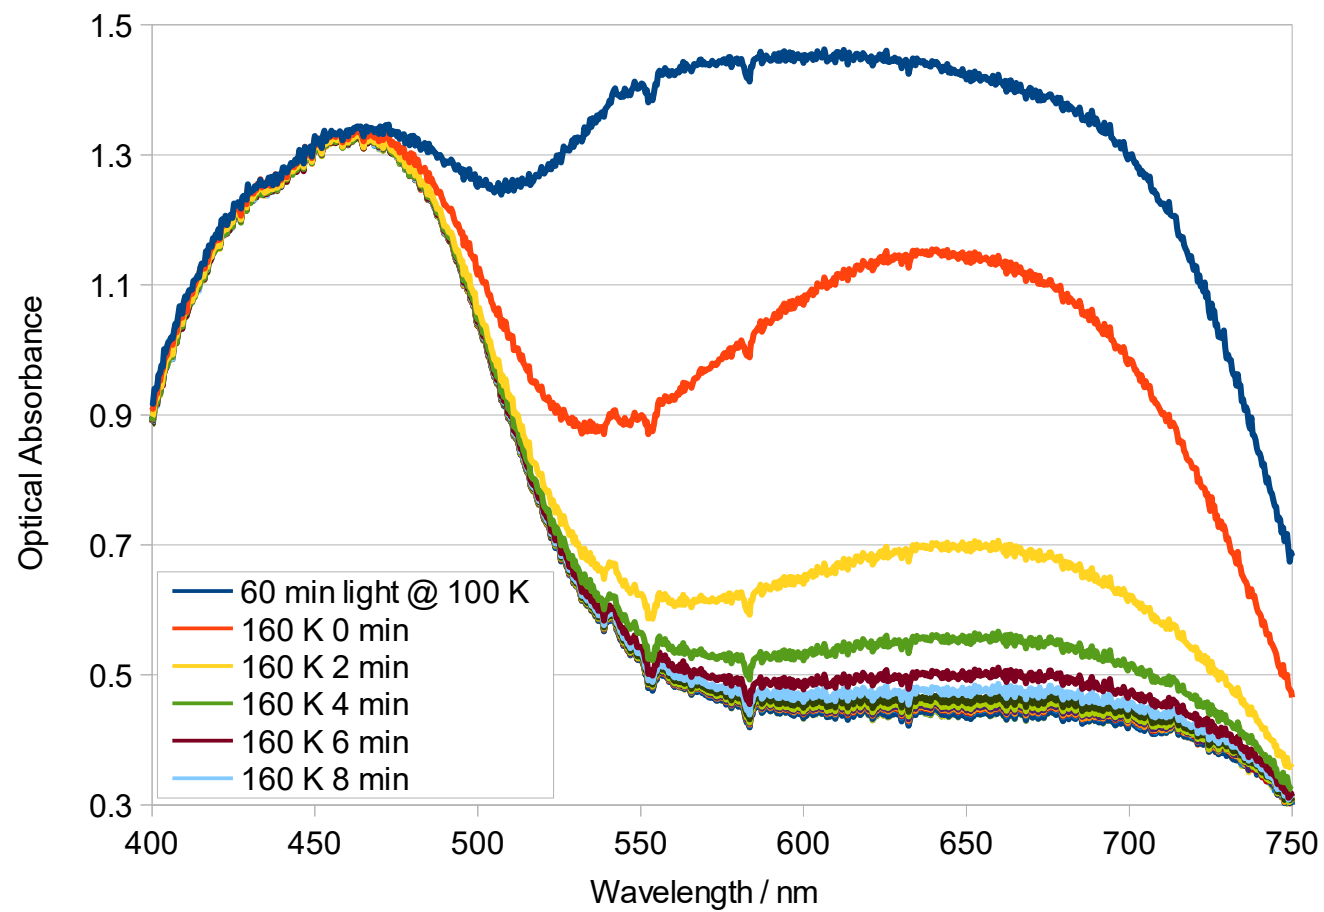

Thermal Decay at 1 while held at 163 K for n Minutes

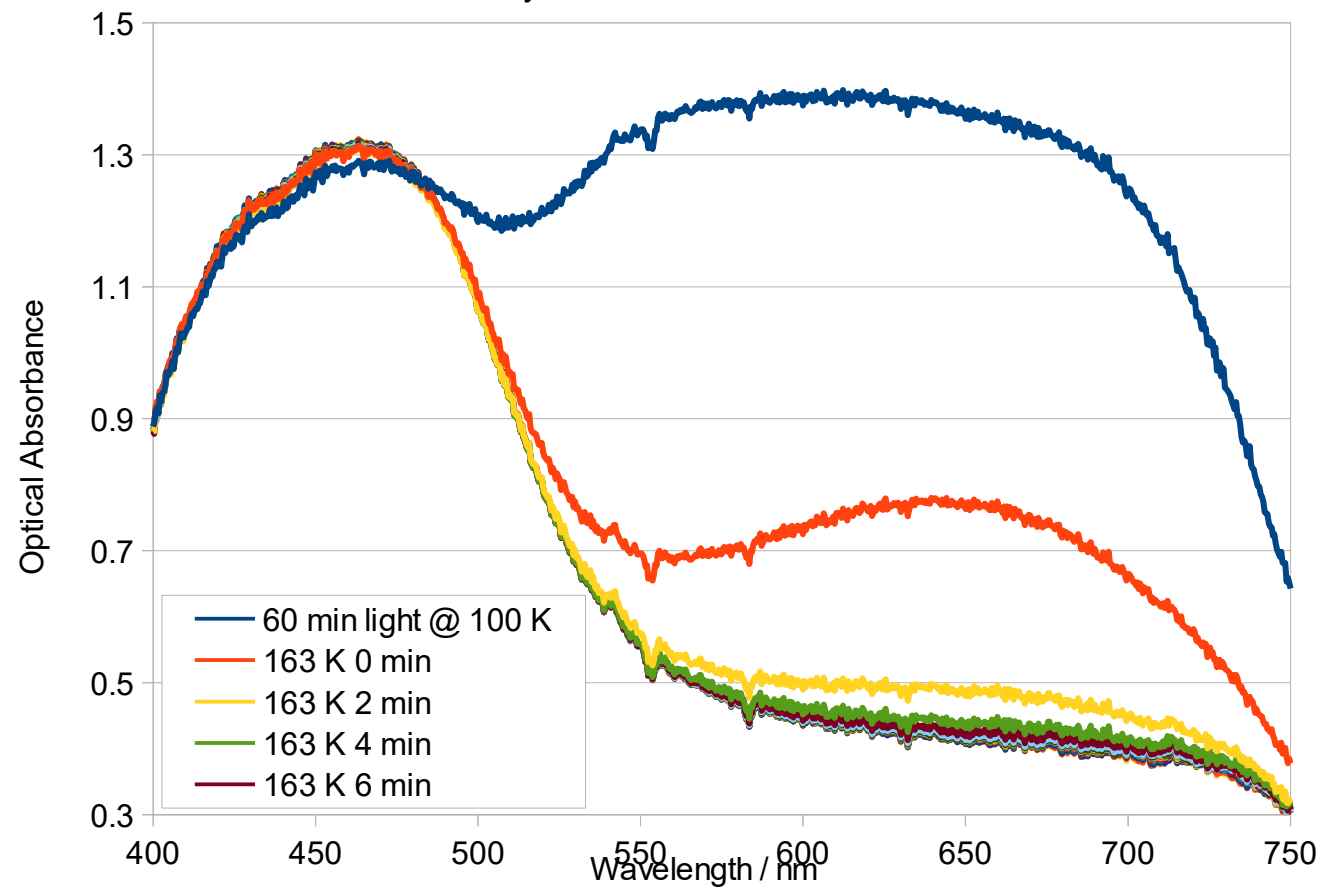

S3 - Hirshfeld surfaces of the anions in the dark and light-induced crystal structures of **1** and *trans*-[Ru(SO<sub>2</sub>)(NH<sub>3</sub>)<sub>4</sub>(H<sub>2</sub>O)]chlorobenzenesulfonate<sub>2</sub>

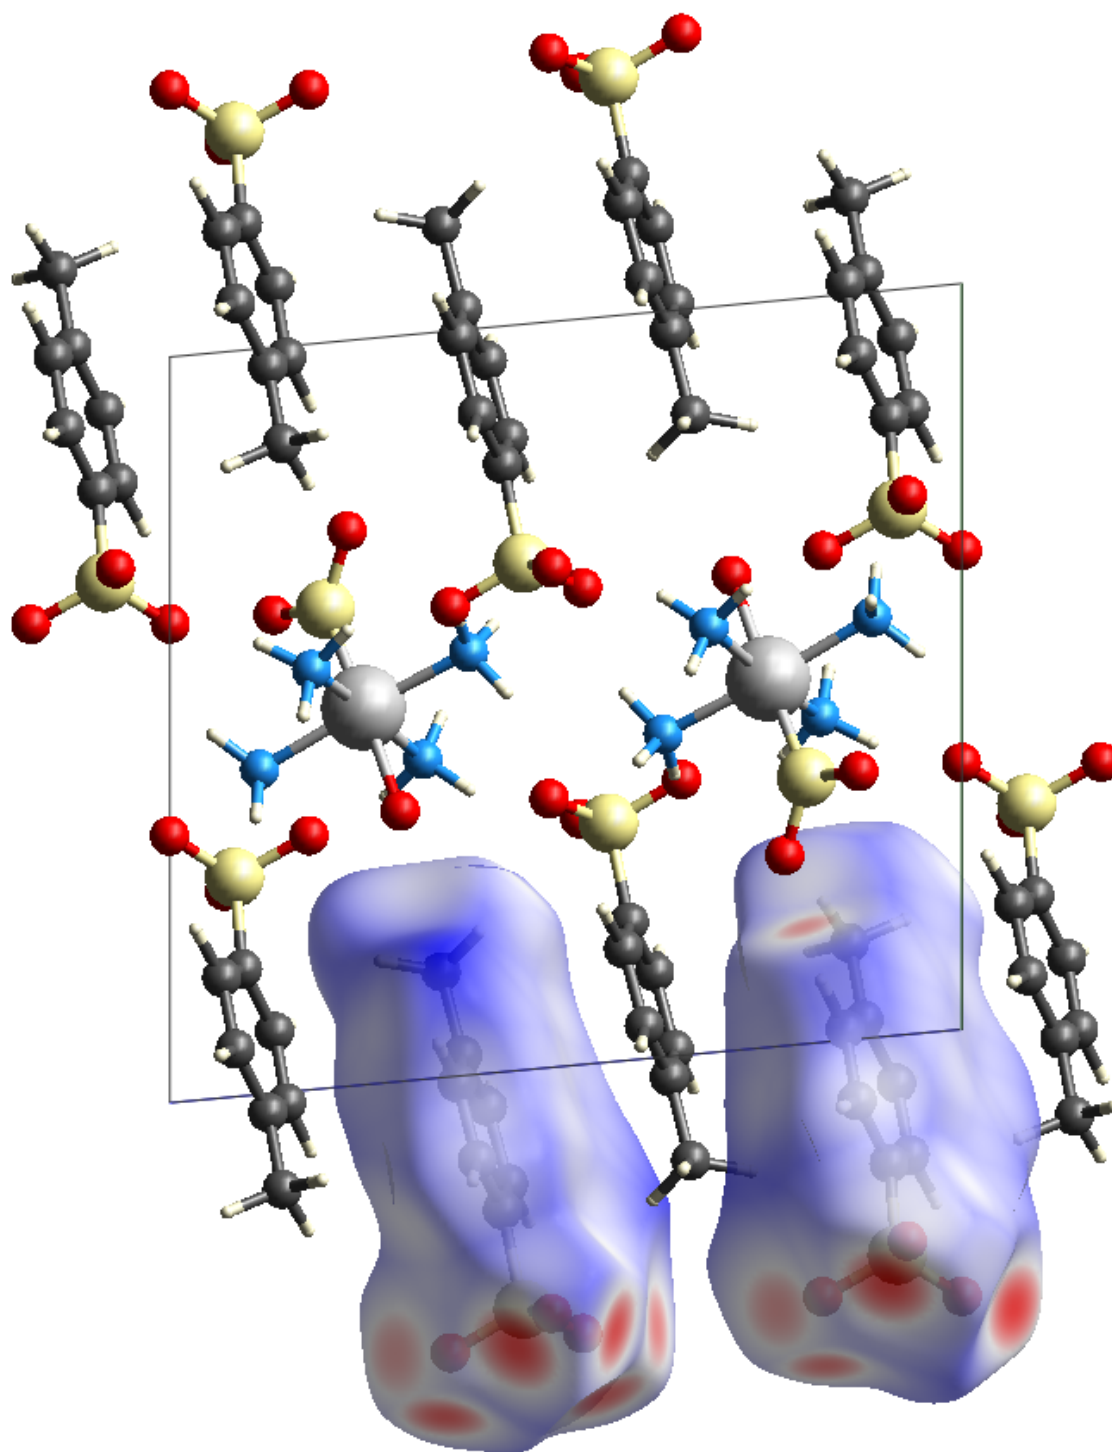

**Figure S10** Hirshfeld surfaces of anions in the dark-state crystal structure of **1**, viewed looking down the crystallographic *a* axis. The image was generated via CrystalExplorer.[1]

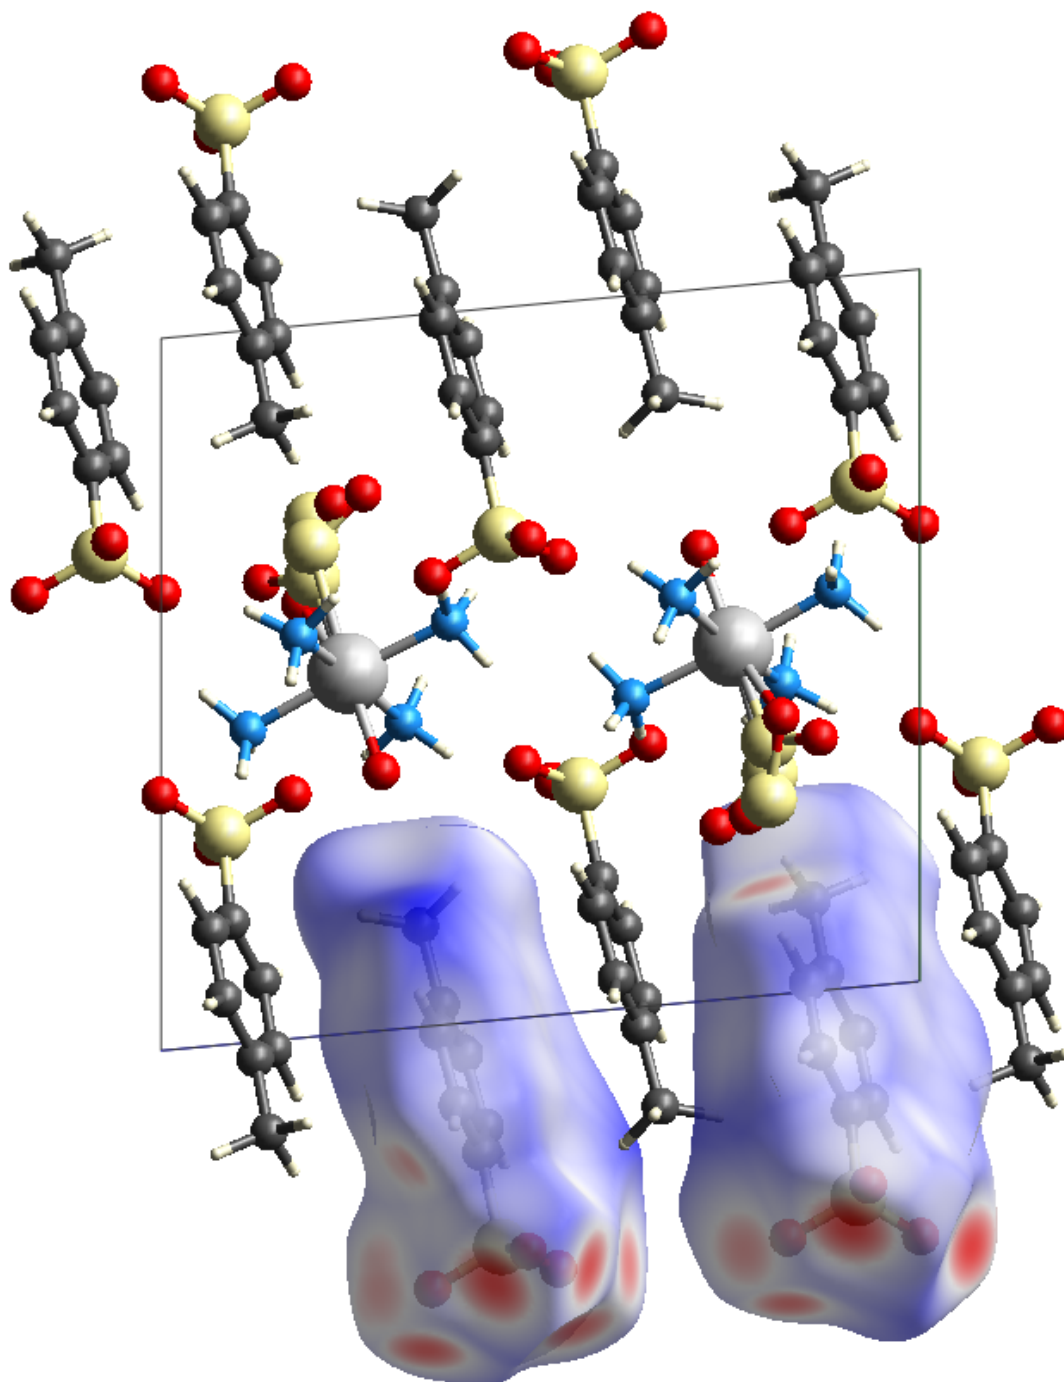

**Figure S11** Hirshfeld surfaces of anions in the light-induced crystal structure of **1**, viewed looking down the crystallographic *a* axis. The image was generated via CrystalExplorer.[1]

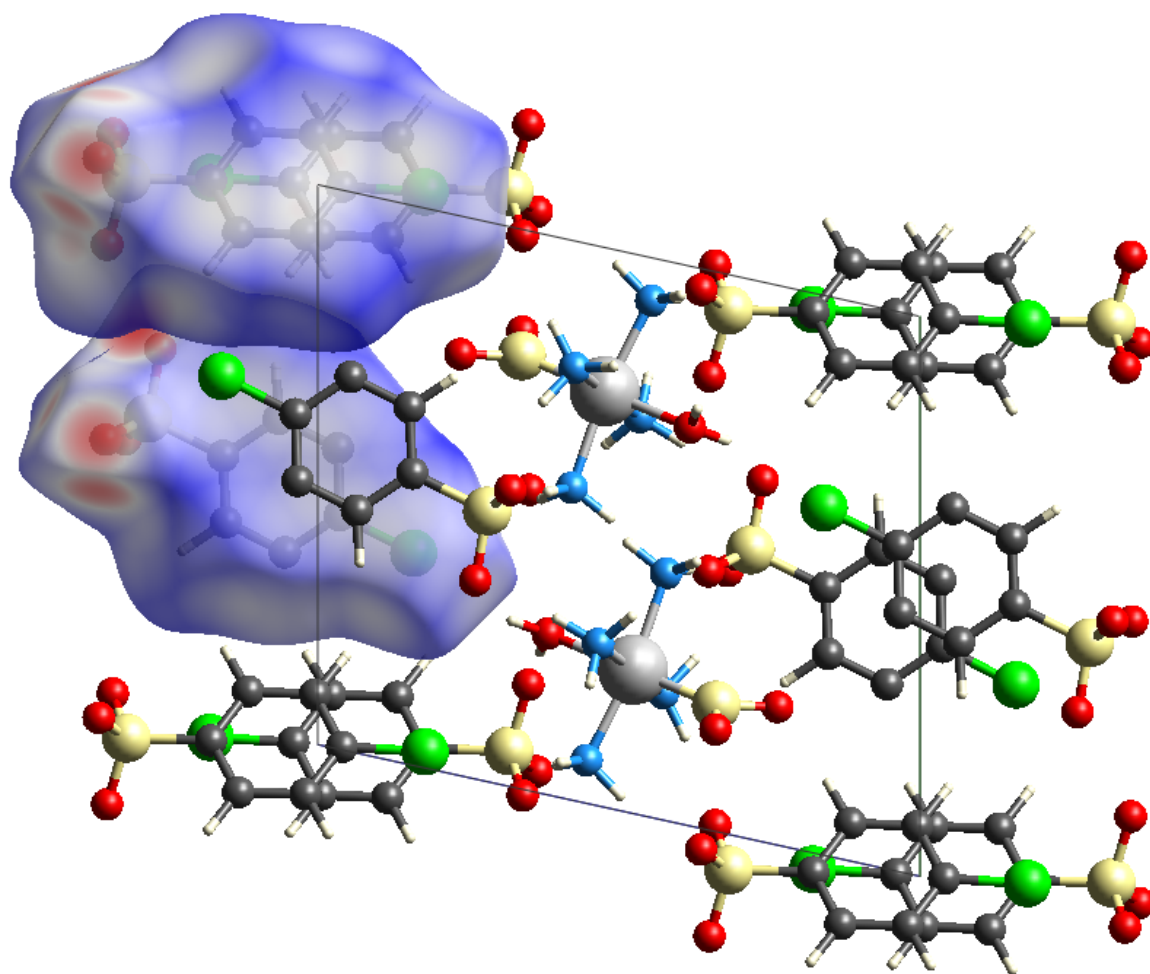

**Figure S12** Hirshfeld surfaces of anions in the dark-state crystal structure of *trans*-[Ru(SO<sub>2</sub>)(NH<sub>3</sub>)<sub>4</sub>(H<sub>2</sub>O)]chlorobenzenesulfonate<sub>2</sub>, viewed looking down the crystallographic *a* axis. The image was generated via CrystalExplorer.[1]

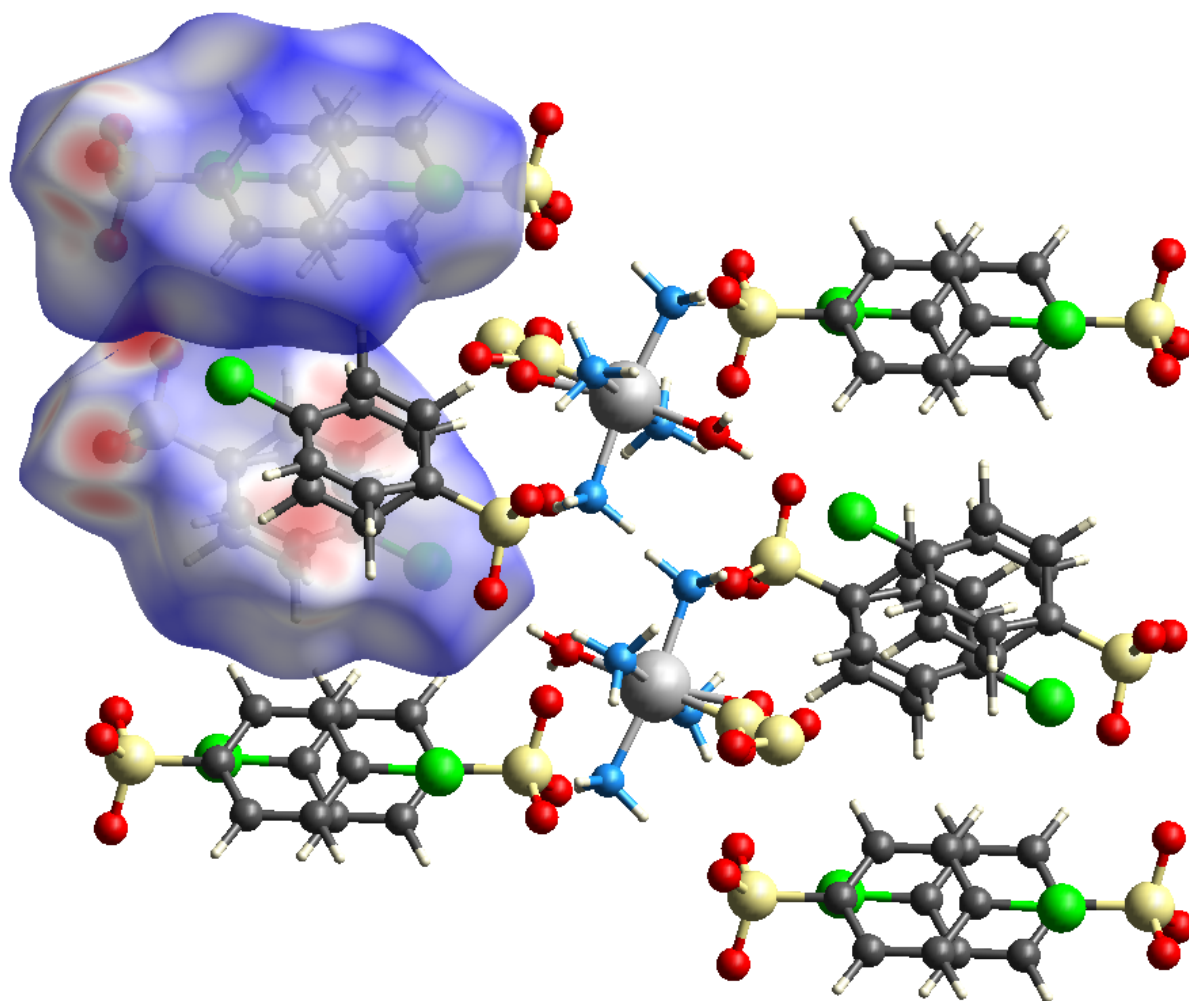

**Figure S13** Hirshfeld surfaces of anions in the light-induced crystal structure of *trans*-[Ru(SO<sub>2</sub>)(NH<sub>3</sub>)<sub>4</sub>(H<sub>2</sub>O)]chlorobenzenesulfonate<sub>2</sub>, viewed looking down the crystallographic *a* axis. The image was generated via CrystalExplorer.[1]

## S4 – References

[1] Turner, M. J.; McKinnon, J. J.; Wolff, S. K.; Grimwood, D. J.; Spackman, P. R.; Jayatilaka, D.; Spackman, M. A. CrystalExplorer17 (2017). University of Western Australia.  
<https://hirshfeldsurface.net>.
